# Supplementary material for: Watson–Crick base pairing in 9-methyladenine and ethylene-9,9′-diadenine structures with close to 70% solvent content
Source: Royal Society of Chemistry journal article supplement (doi:10.1039/c6ce01159d), 2016-01-01
Supplement: c6ce01159d1.pdf [file c6ce01159d1.pdf]

## Watson-Crick base pairing in 9-methyladenine and ethylene-9,9'-diadenine structures with close to 70 % solvent content

L. Qi, L.-L. Gundersen, E. J. Chamgordani and C. H. Görbitz\*

*Department of Chemistry, University of Oslo, P.O.Box 1033 Blindern, N-0315 Oslo, Norway.*

*E-mail: c.h.gorbitz@kjemi.uio.no*

### SUPPLEMENTARY INFORMATION

|                                                            |        |
|------------------------------------------------------------|--------|
| Figure 1S. Solvent region of the crystal structure of (I)  | page 1 |
| Figure 2S. Solvent region of the crystal structure of (II) | page 2 |
| Reference                                                  | page 2 |

---

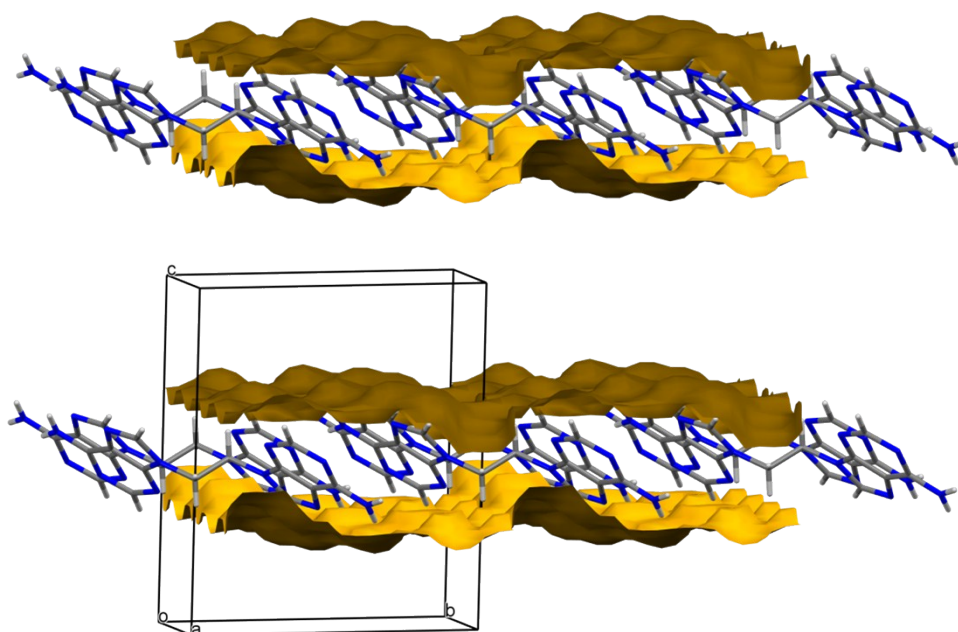

**Figure 1S.** 2-Dimensional void space in the crystal structure of (I) after removal of solvent accounting for 67.0 % of the unit cell volume using the void calculator in Mercury<sup>1</sup> (contact surface, 1.7 Å probe radius, 0.7 Å grid spacing).

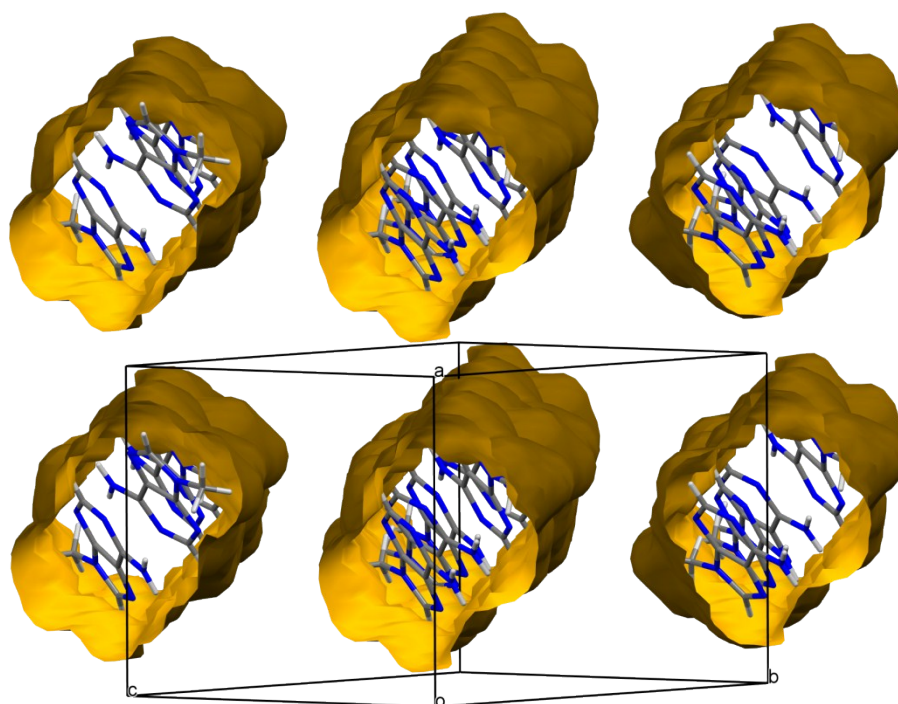

**Figure 2S.** 3-Dimensional void space in the crystal structure of (II) after removal of solvent accounting for 69.3 % of the unit cell volume (Mercury settings as for Figure 1S).

## Reference

1. C. F. Macrae, I. J. Bruno, J. A. Chisholm, P. R. Edgington, P. McCabe, E. Pidcock, L. Rodriguez-Monge, R. Taylor, J. van de Streek and P. A. Wood, *J. Appl. Crystallogr.*, 2008, **41**, 466-470.
